# Supplementary material for: RANKL immunisation inhibits prostate cancer metastasis by modulating EMT through a RANKL-dependent pathway
Source: PubMed Central journal article supplement (PMC8190078; doi:10.1038/s41598-021-91721-2), 2021-06-09

# **RANKL immunisation inhibits prostate cancer metastasis by modulating EMT through a RANKL-dependent pathway**

Mineon Park<sup>1,2,\*</sup>, Yong Jin Cho<sup>1,2,\*</sup>, Bora Kim<sup>1,2</sup>, Young Jong Ko<sup>1,2</sup>, Yuria Jang<sup>1,2</sup>, Yeon Hee Moon<sup>3</sup>, Hoon Hyun<sup>4</sup>, Wonbong Lim<sup>1,2,5†</sup>

## **Affiliations**

<sup>1</sup>Laboratory of Orthopaedic Research, Chosun University Hospital, Dong-Gu, Gwangju, 61452, Republic of Korea

<sup>2</sup>Department of Orthopaedic Surgery, Chosun University Hospital, Dong-Gu, Gwangju, 61452, Republic of Korea

<sup>3</sup>Department of Dental Hygiene, Chodang University, Muan County, Jeollanam-do, 58530, Republic of Korea

<sup>4</sup>Department of Biomedical Sciences Chonnam National University Medical School, Gwangju 61469, Republic of Korea

<sup>5</sup>Department of Premedical Science, College of Medicine, Chosun University, Dong-Gu, Gwangju 61452, Republic of Korea

\*These authors contributed equally to this work.

†Correspondence to: Wonbong Lim, Department of Premedical Sciences, College of Medicine, Chosun University, Dong-Gu, Gwangju, 501-759, Korea;

E-mail: [wonbong@chosun.ac.kr](mailto:wonbong@chosun.ac.kr)

Phone: +82 62-230-6193; Fax: +82 62-226-3379;

### **Contact info**

Mineon Park            parkminun@hanmail.net

Yong Jin Cho            choisidoru@chosun.ac.kr

Bora Kim                kbr85025@naver.com

Young Jong Ko        yeasts@hanmail.net

Yuria Jang              youria0526@nate.com

Yeon Hee Moon        yhmon@chodang.ac.kr

Hoon Hyun              hhyun@jnu.ac.kr

Wonbong Lim            wonbong@chosun.ac.kr

### **Acknowledgements**

This study was supported by research funding from Chosun University (awarded in 2020).

## Supple. 1

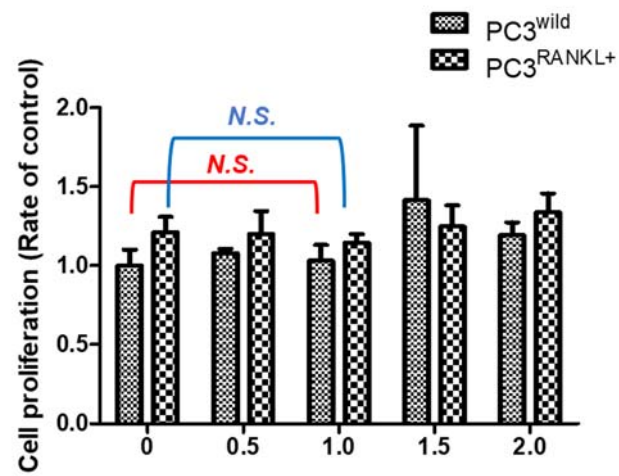

**Supple 1. Cell proliferation by BrDu assay on hRANKL treated PC3<sup>wild</sup> and PC3<sup>RANKL+</sup> in dose dependent manners.** Data are expressed as means  $\pm$  SD with three independent experiment. No significant differences were detected in compared with 0 $\mu$ g hRANKL and 1 $\mu$ g , respectively.

## Supple.2

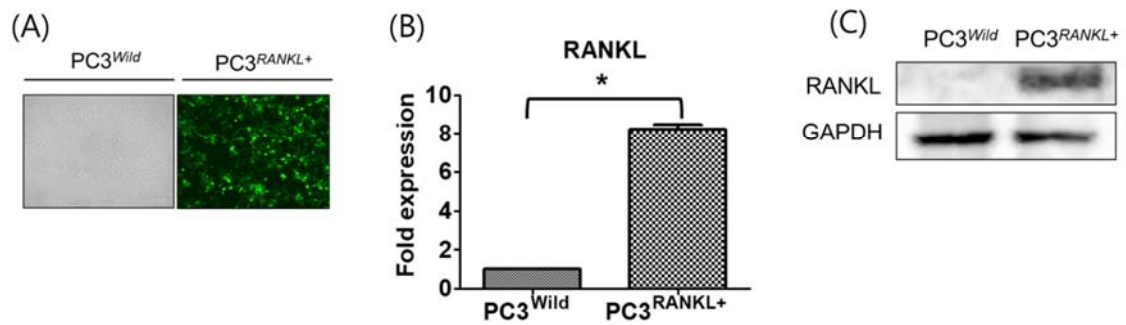

**Supple 2. Overexpression of RANKL in PC3.** (A) GFP-expressing PC3<sup>RANKL+</sup> cells were monitored by fluorescence microscopy. Magnification, 100 $\times$ ; scale bar, 100  $\mu$ m. (B) Reverse-transcription quantitative polymerase chain reaction analysis of *RANKL* mRNA expression in PC3<sup>Wild</sup> and PC3<sup>RANKL+</sup> cells. *GAPDH* was used as a loading control. Significant differences were observed at \* $p < 0.05$ , compared with the control. (C) Western blot analysis of RANKL expression in PC3<sup>Wild</sup> and PC3<sup>RANKL+</sup> cells. *GAPDH* was used as a loading control.

### Supple.3

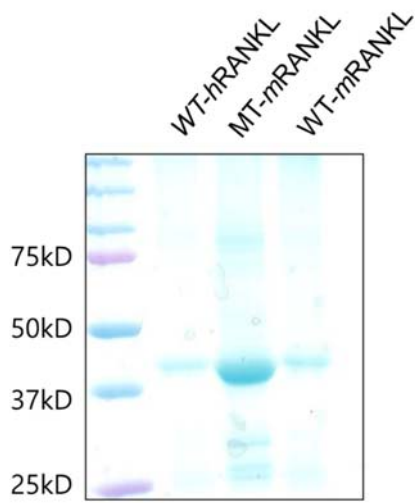

### **Supple 3. Amplification and cloning of cDNA encoding the active fragments of RANKL.**

The molecular sizes of hRANKL, mRANKL-WT and mRANKL-MT were confirmed by SDS-PAGE.

## Supple.4

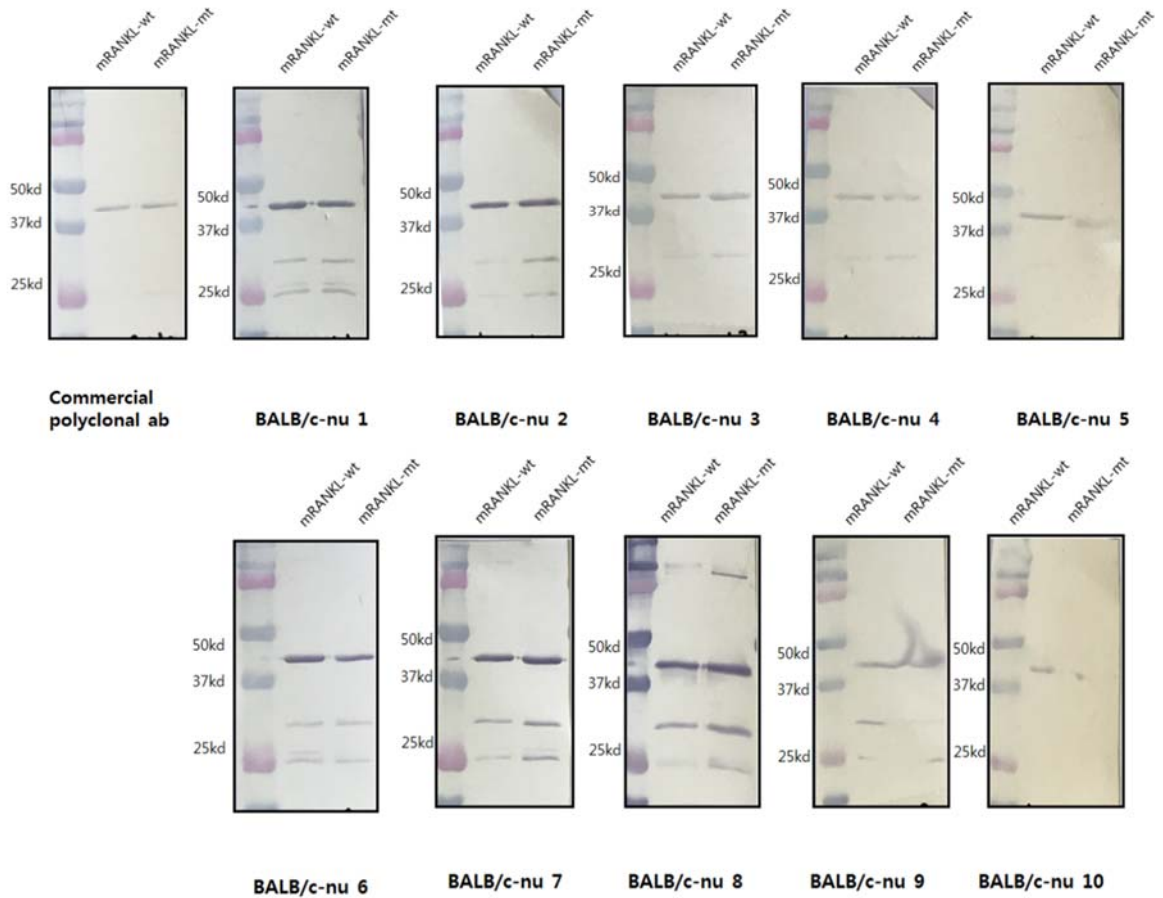

**Supple 4.** Immunoblot of mRANKL-WT and mRANKL-MT with mtRANKL-immunized BALB-c/nu mouse serum (right) as primary antibodies. The first panel indicated the mRANKL-WT and mRANKL-MT detected by commercial polyclonal RANKL antibody. In entire 10 mice, ani-RANKL for mRANKL-WT and mRANKL-MT were detected.

## Figure legends

### Figure 1. EMT and metastatic properties of PC3 cells following hRANKL treatment.

(A) Treatment with hRANKL led to a significant increase in the migratory capacity of PC3 cells, as evident from the decrease in the wound gap distance at 48 h. Magnification, 100×; scale bar, 100  $\mu$ m. The data in the associated graphs are expressed as the mean  $\pm$  SD. (B) Transwell invasion assays were performed to compare the invasiveness of hRANKL-treated PC3 cells and untreated cells. Treatment with hRANKL led to a significant reduction in the invasiveness of PC3 cells. Magnification, 100×; scale bar, 100  $\mu$ m. Data in the associated graphs are expressed as the mean  $\pm$  SD. (C) Real-time quantitative polymerase chain reaction for the analysis of EMT and metastasis markers in hRANKL-treated PC3 cells.  $\beta$ -Actin was used as a loading control. Significant differences were observed at \* $p < 0.05$ , compared with the control. (D) Expression of EMT and metastasis-related proteins E-cadherin, Vimentin,  $\beta$ -catenin, MMP-9, IL-6, c-MYC, TCF-4 and  $\beta$ -actin in hRANKL-treated PC3 cells was measured by western blotting.  $\beta$ -actin was used as a loading control. (E) Western blot analysis of MAPK phosphorylation in PC3 cells incubated with 1  $\mu$ g/mL hRANKL for 0, 5, 15 and 30 min. (F) Co-immunoprecipitation of  $\beta$ -catenin and TCF-4 in hRANKL-treated PC3 cells. Results are representative of three separate experiments with comparable results. (G) TOP/FOP luciferase reporter assays in PC3<sup>Wild</sup> and PC3<sup>RANKL+</sup> cells. Significant differences were observed at \* $p < 0.05$ , compared with the control.

### Figure 2. Modulation of the EMT and metastatic properties of PC3 cells following overexpression of RANKL.

(A) A cell migration assay was performed to compare wound healing in PC3<sup>Wild</sup> and PC3<sup>RANKL+</sup> cells. PC3<sup>RANKL+</sup> cells showed a significant increase in migratory capacity, as evident from the decreased wound gap at 48 h. Magnification, 100×; scale bar, 100  $\mu$ m. The data in the

associated graphs are expressed as the mean  $\pm$  SD. (B) Transwell invasion assays were performed to compare the invasiveness of PC3<sup>Wild</sup> and PC3<sup>RANKL+</sup> cells. PC3<sup>RANKL+</sup> cells showed a significant increase in invasiveness. Magnification, 100 $\times$ ; scale bar, 100  $\mu$ m. Data in the associated graphs are expressed as the mean  $\pm$  SD. (C) Real-time quantitative polymerase chain reaction for the analysis of EMT and metastasis markers in PC3<sup>RANKL+</sup> cells.  $\beta$ -Actin was used as a loading control. Significant differences were observed at \* $p < 0.05$ , compared with the control. (D) Expression of E-cadherin, Vimentin,  $\beta$ -catenin, MMP-9, IL-6 and  $\beta$ -actin in PC3<sup>Wild</sup> and PC3<sup>RANKL+</sup> cells, as measured by western blotting.  $\beta$ -actin was used as a loading control. (E) Immunoprecipitation for  $\beta$ -catenin and TCF-4 in PC3<sup>Wild</sup> and PC3<sup>RANKL+</sup> cells. Each blot was obtained under the same experimental conditions and the data are representative of three separate experiments with comparable results. (F) TOP/FOP luciferase reporter assays in PC3<sup>Wild</sup> and PC3<sup>RANKL+</sup> cells. Significant differences were observed at \* $p < 0.05$ , compared with the control.

### **Figure 3. Effects of immunisation with mutant RANKL.**

(A) Comparison of the sequences of hRANKL, mRANKL-WT and mRANKL-MT. (B) *In vivo* experimental flow. Male BALB-c/nu mice (6-weeks-old) were immunised with a subcutaneous injection of test agent (20  $\mu$ g/kg). (C) Tumour growth and metastases were monitored via *in vivo* bioluminescence imaging of the reporter activity induced by PC3<sup>Wild</sup>, PC3<sup>RANKL+</sup> and PC3<sup>RANKL+</sup> + IM treatment. Data per representative mouse are shown. A large hot-spot of bioluminescence was observed *in vivo* following inoculation of mice with PC3<sup>RANKL+</sup> cells. Multiple localised and distant metastases were observed *in vivo* after the injection of PC3<sup>RANKL+</sup> cells into the hearts of nude mice. Coloured bars indicate the bioluminescence signal intensity (photon/s/cm<sup>2</sup>/steradian). (D) The bioluminescence photon flux that appeared after inoculation of cells into mice is shown graphically. Data from related graphs are displayed as the mean  $\pm$



SD. (E) Survival and (F) metastasis rate in mice from the SHAM, PC3<sup>Wild</sup>, PC3<sup>RANKL+</sup> and PC3<sup>RANKL+</sup> + IM groups.

**Figure 4. Effects of immunisation with mutant RANKL on PC3-the inoculated metastatic model.** (A) Three-dimensional micro-CT images revealed the trabecular bone architecture of the volume of interest in SHAM and mRANKL-immunized (IMMUNIZATION) mouse femurs (n = 10 images taken in total, one image for each mouse). (B) Bone mineral density (BMD) and (C) Serum calcium Level are shown. No significant differences were observed between two groups. (N.S.) (D) representative H&E stained and immunostained images of RANKL and IL-6 in the PC3<sup>Wild</sup>, PC3<sup>RANKL+</sup> and PC3<sup>RANKL+</sup> + IM groups. The metastatic tumor cells or immuno-positive cells were indicated by black arrows. Magnification: 200×. Scale bar = 100 μm. (E) Concentration of RANKL in mouse serum. The mean ± SD values were obtained by densitometry, as shown in the analysis. Significant differences were observed at \*p < 0.05 and \*\*p < 0.01 vs. control. (F) Serum samples from mice were obtained after immunisation. Anti-RANKL values in PC3<sup>Wild</sup>, PC3<sup>RANKL+</sup> and PC3<sup>RANKL+</sup> + IM groups. The mean ± SD values were obtained by densitometry, as shown in the analysis. Significant differences were observed at \*p < 0.05 and \*\*p < 0.01 vs. the control. (G) Anti-RANKL values and (H) RANKL concentration in the serum of RANKL immunized mice with metastasis (+) or metastasis (-). Bar graphs show the mean ± standard deviation (SD). Significant differences were observed at \*p < 0.05, metastasis (+) vs. no metastasis (-).

**Figure 5. EMT and metastatic properties of PC3 cells treated with immune sera.**

(A) Cell migration assays were performed to compare the wound healing capacity of immune serum-treated PC3<sup>RANKL+</sup> cells and untreated cells. Immune serum treatment decreased the migration capacity of PC3 cells, as evident from the increase in the wound healing gap at 48 h.

Magnification, 100×; scale bar, 100  $\mu$ m. Data from related graphs are displayed as the mean  $\pm$  SD. (B) Transwell invasion assays were performed to compare the invasiveness of immunised serum-treated PC3<sup>RANKL+</sup> and untreated cells. Serum-treated PC3<sup>RANKL+</sup> cells showed a significant decrease in invasiveness. Magnification, 100×; scale bar, 100  $\mu$ m. Data in the associated graphs are expressed as the mean  $\pm$  SD. (C) Real-time quantitative polymerase chain reaction for the analysis of EMT and metastasis markers in PC3<sup>RANKL+</sup> cells.  $\beta$ -Actin was used as a loading control. Significant differences were observed at \* $p < 0.05$ , compared with the control. (D) Expression of E-cadherin, Vimentin,  $\beta$ -catenin, MMP-9, IL-6, c-MYC, TCF-4 and  $\beta$ -actin in immune serum-treated PC3<sup>RANKL+</sup> cells, as measured by western blotting.  $\beta$ -actin was used as a loading control. Similar results were obtained in three independent experiments. (E) Western blot analysis of MAPK phosphorylation levels in serum-treated PC3<sup>RANKL+</sup> cells. Similar results were obtained in three independent experiments. (F) TOP/FOP luciferase reporter assays in immune serum-treated PC3<sup>RANKL+</sup> cells. Significant differences were observed at \* $p < 0.05$  vs. the control. (G) Co-immunoprecipitation of  $\beta$ -catenin and TCF-4 from PC3<sup>RANKL+</sup> and immune serum-treated PC3<sup>RANKL+</sup> cells. Each blot was obtained under the same experimental conditions.

**Figure 6. Schematic diagram illustrating anti-RANKL-mediated inhibition of RANK signaling.** Activation of RANK by RANKL activates AKT and ERK, thereby liberating the active form of  $\beta$ -catenin. Generation of anti-RANKL antibodies by mRANKL-MT inactivates RANKL, thereby downregulating AKT/ERK activity and preventing downstream of  $\beta$ -catenin signaling.

# Blot Original Image

Figure 1D Original

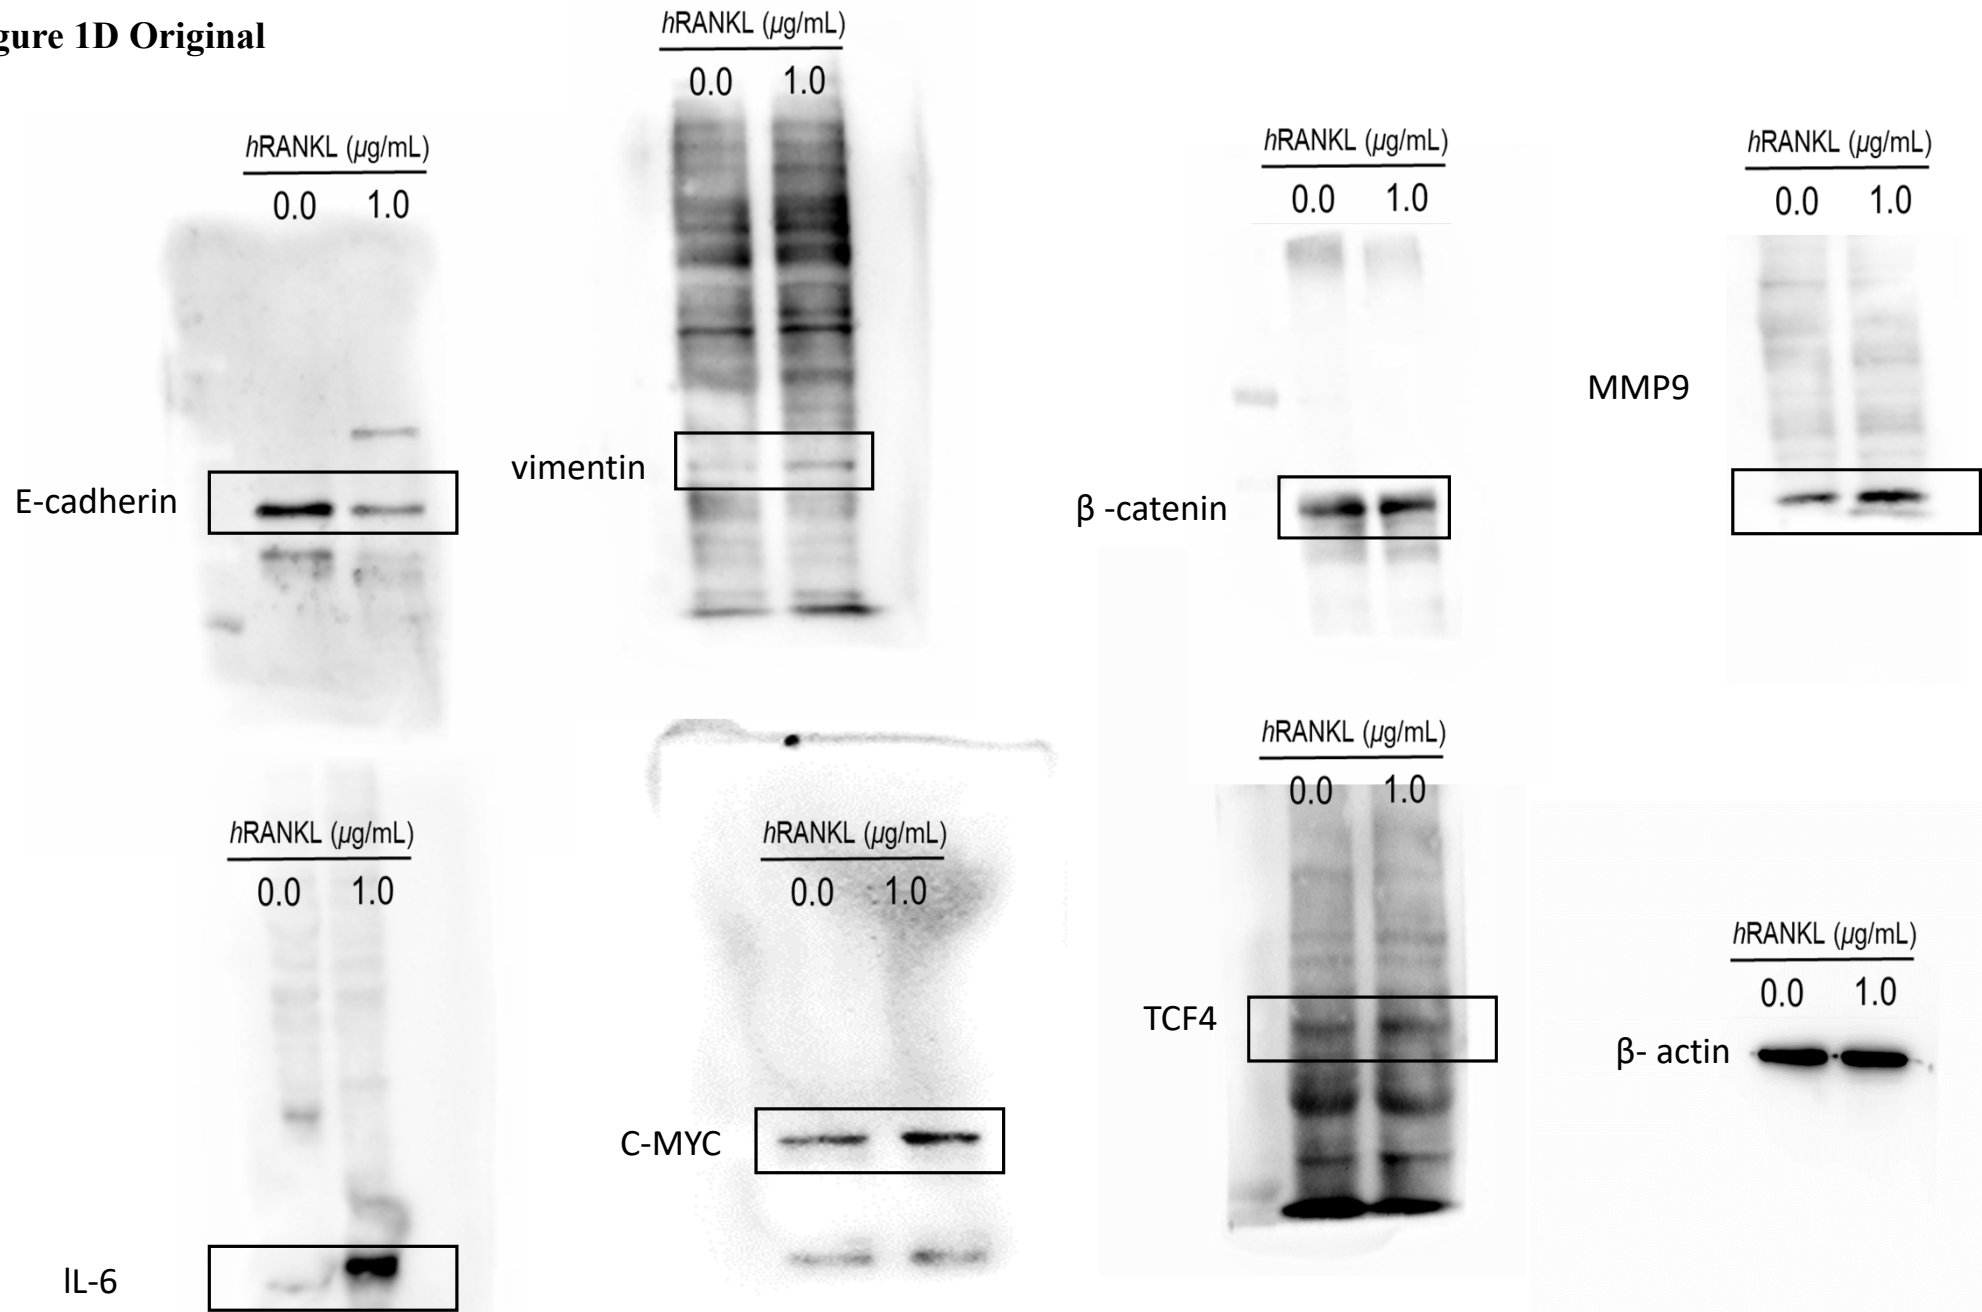

**Figure 1E Original**

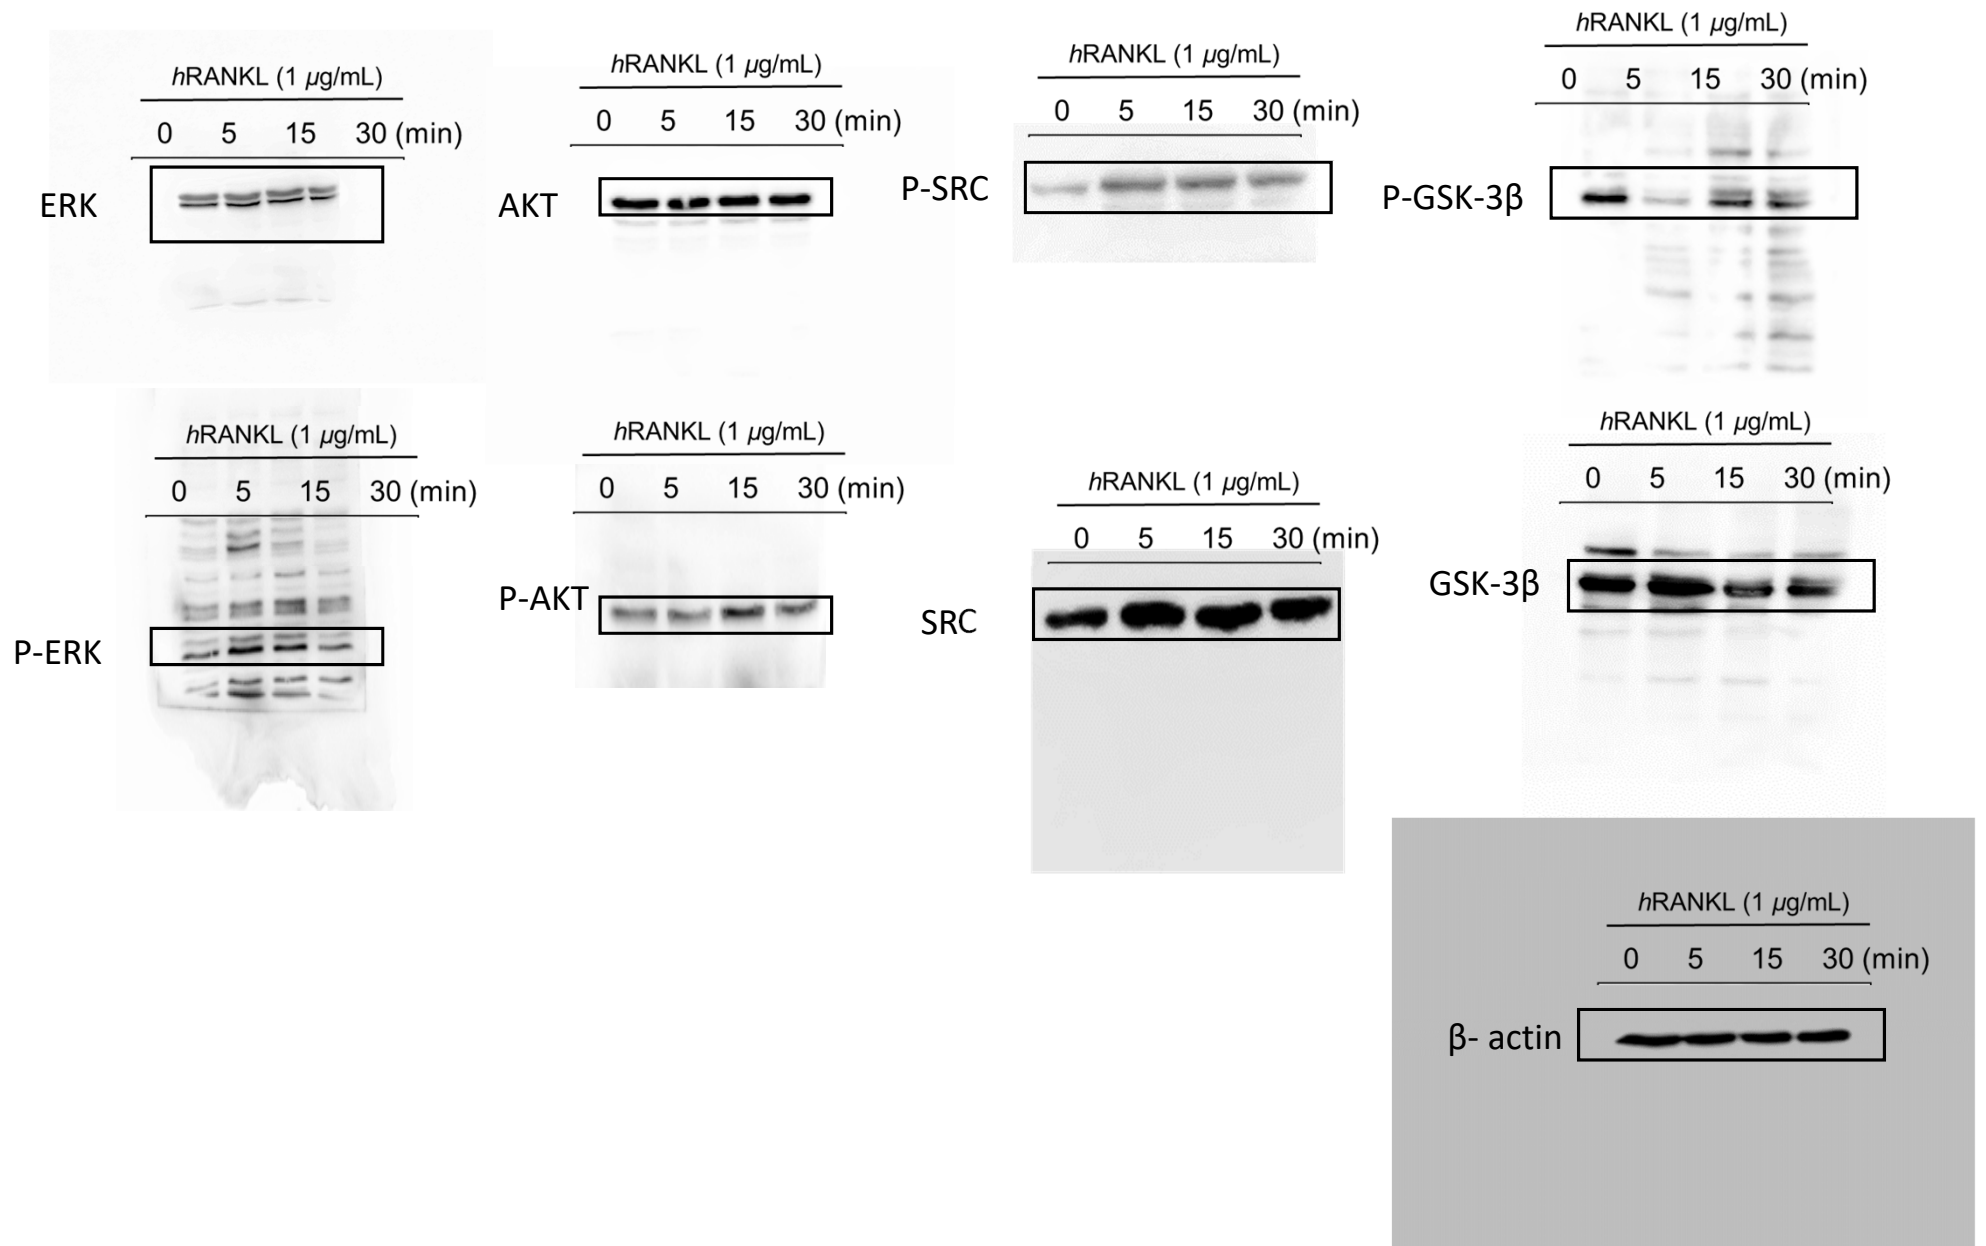

**Figure 1F Original**

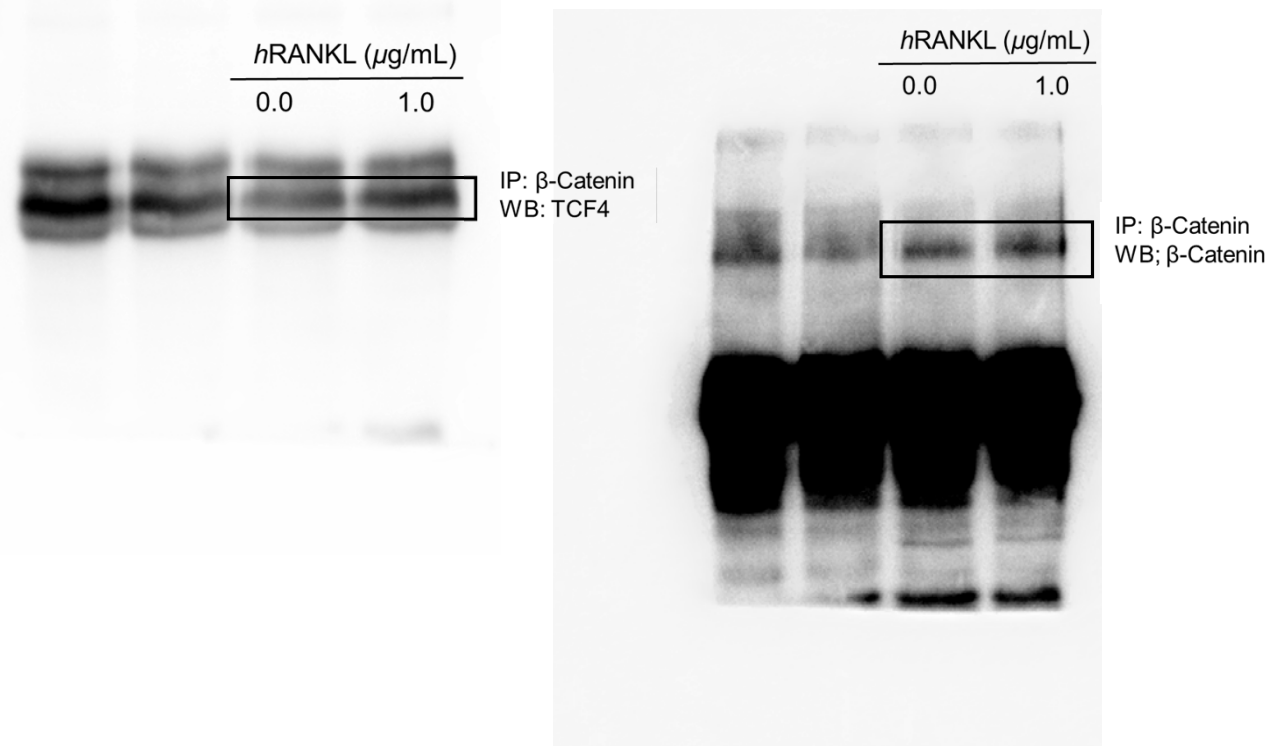

**Figure 2D Original**

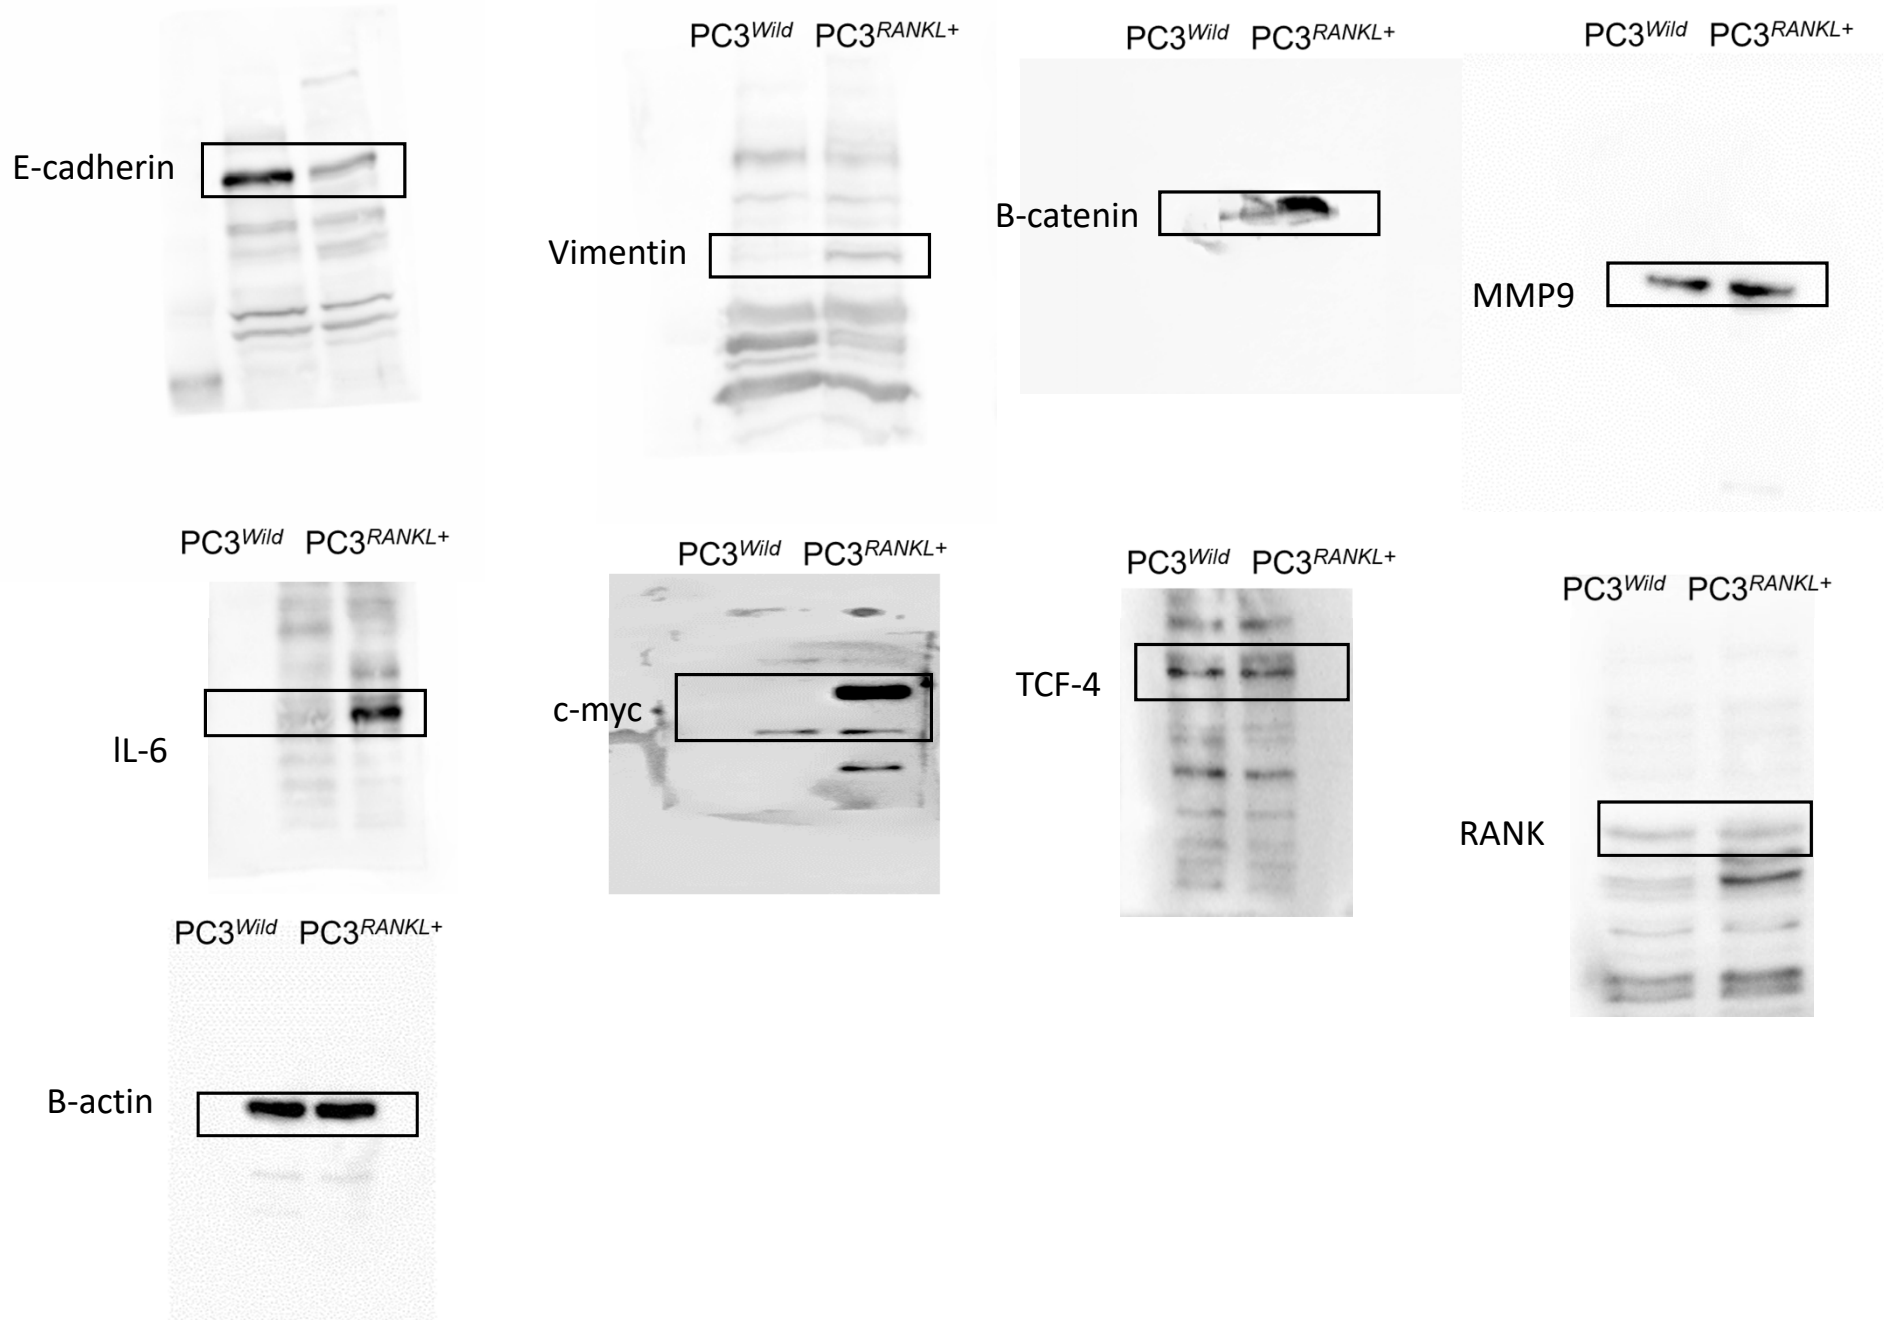

**Figure 2F Original**

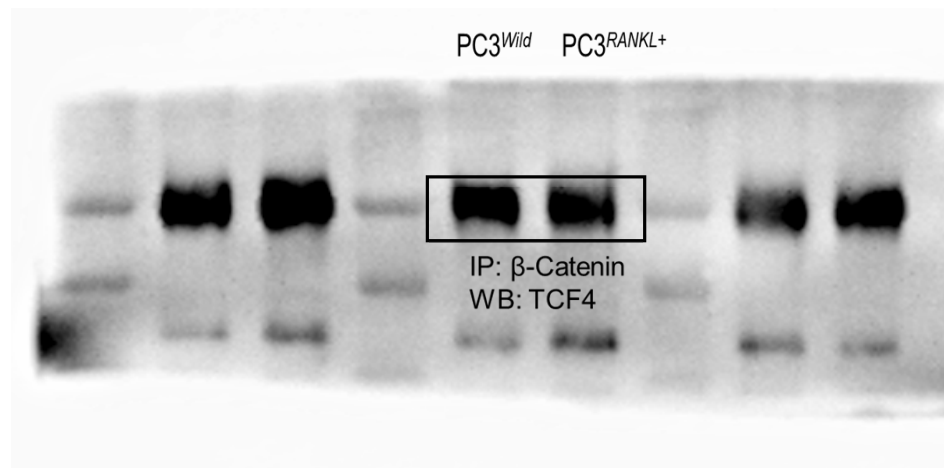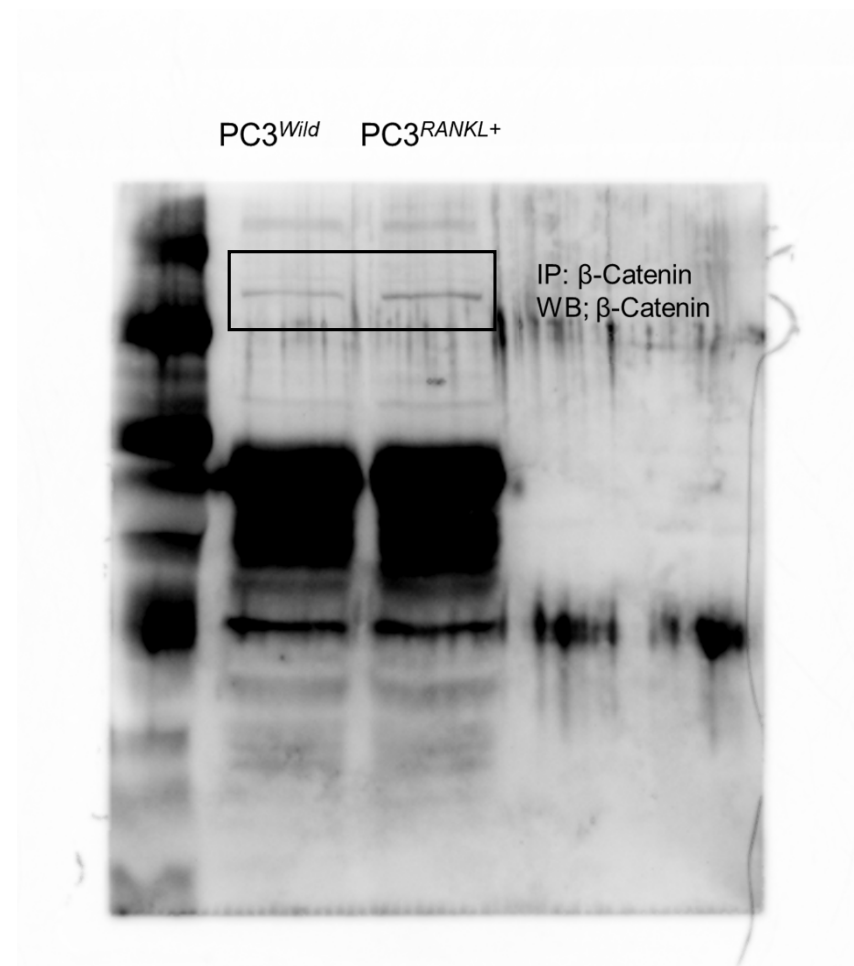

**Figure 5D Original**

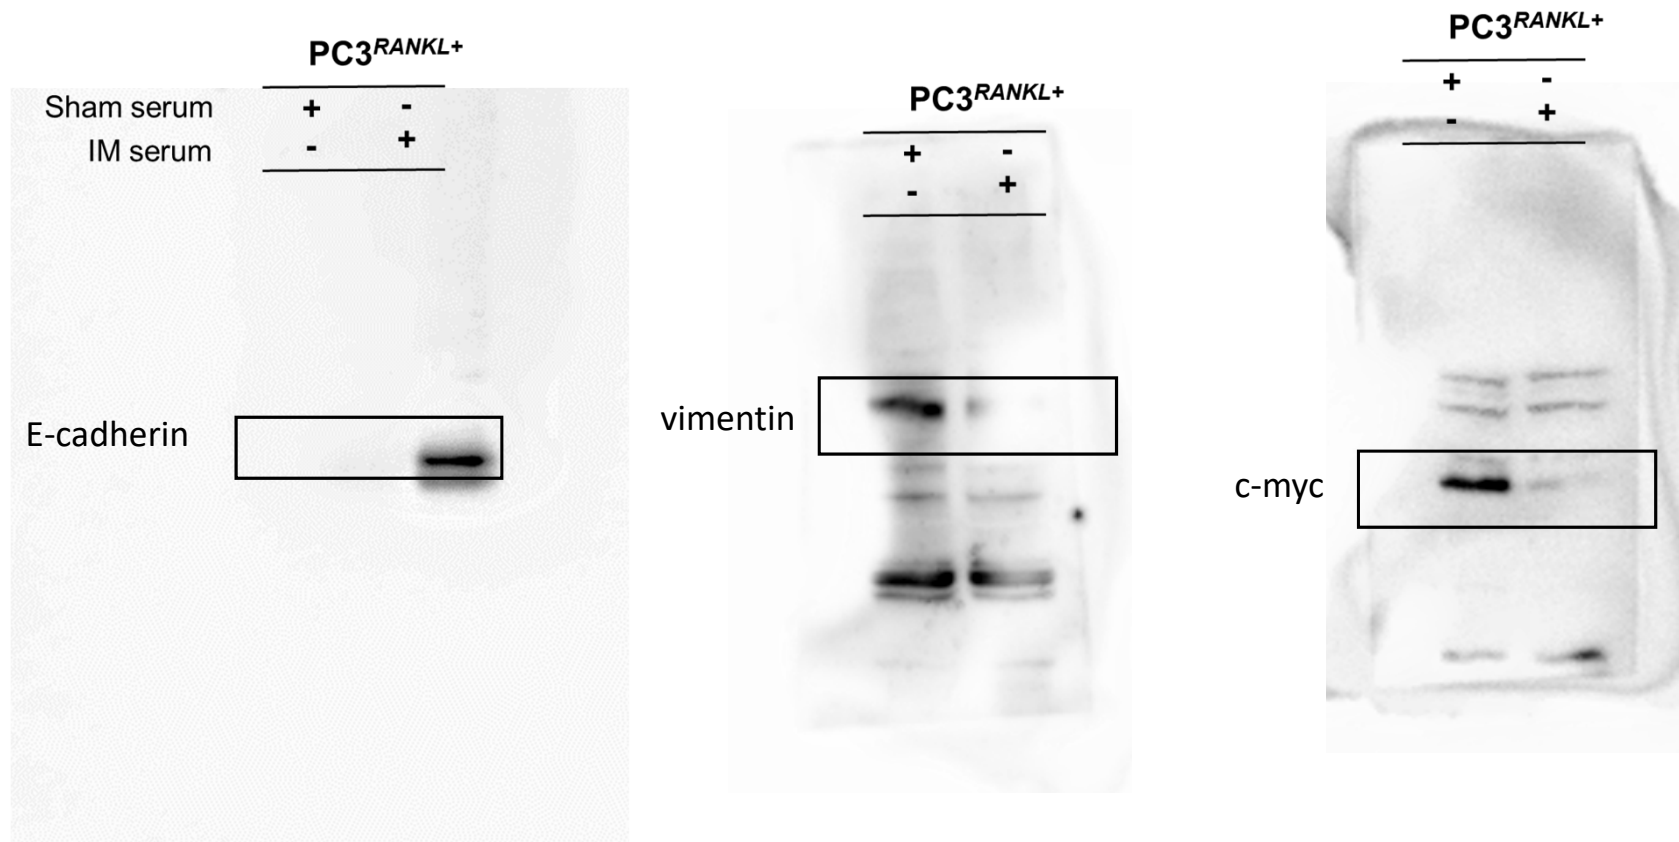



Figure 5D Original

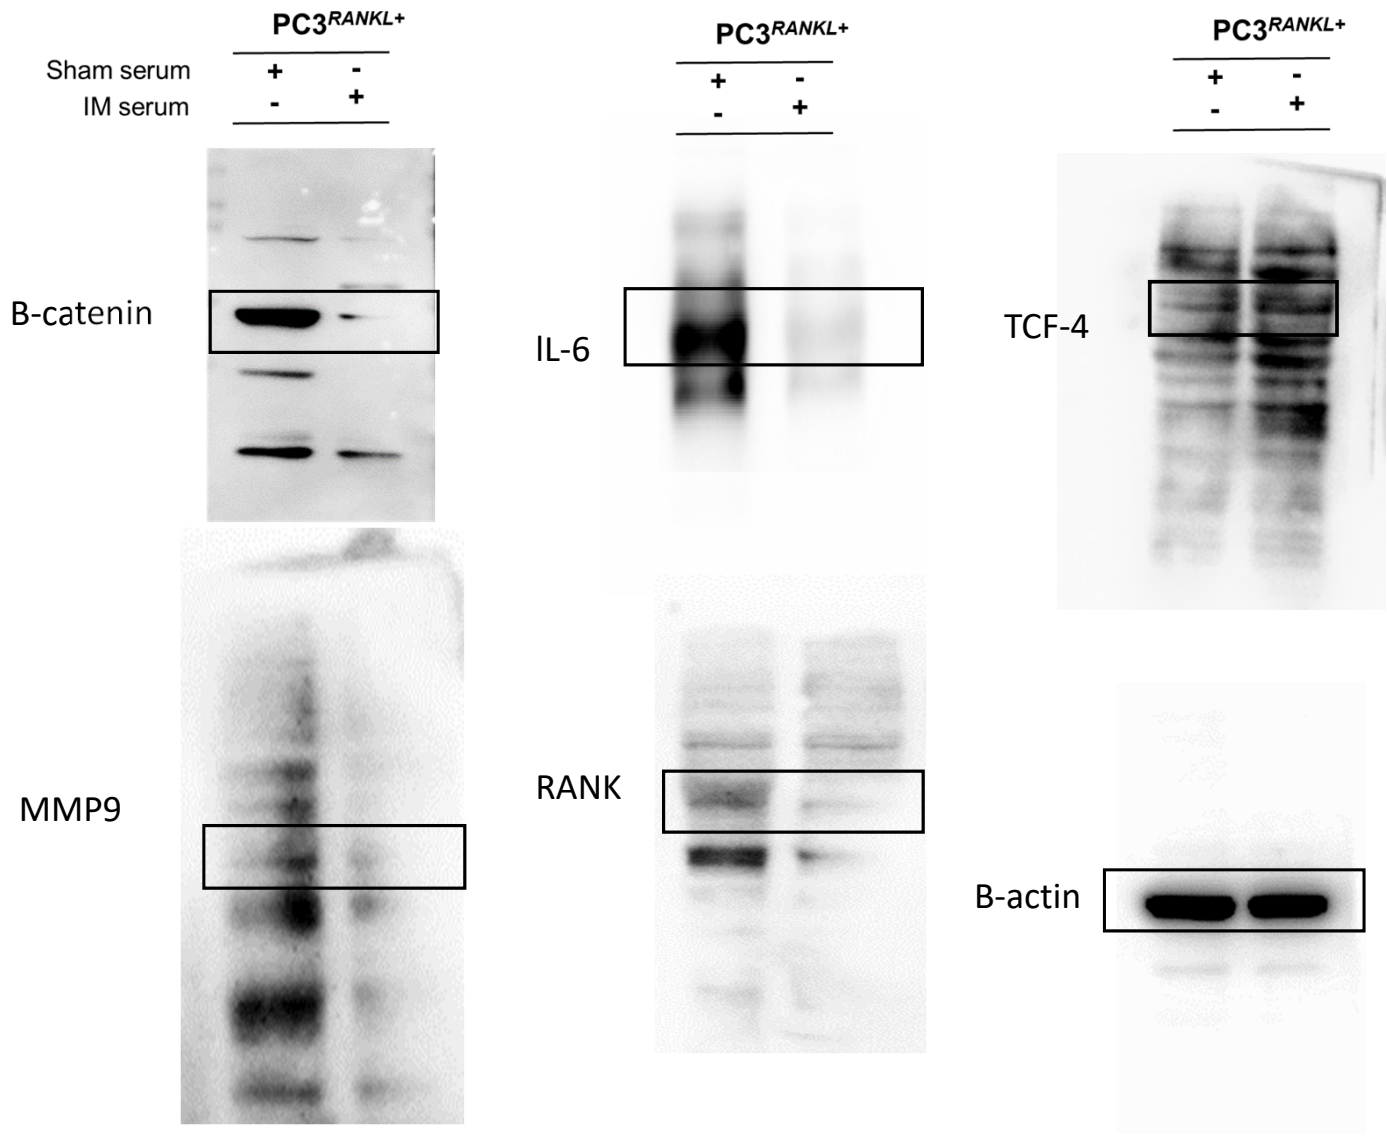

Figure 5E Original

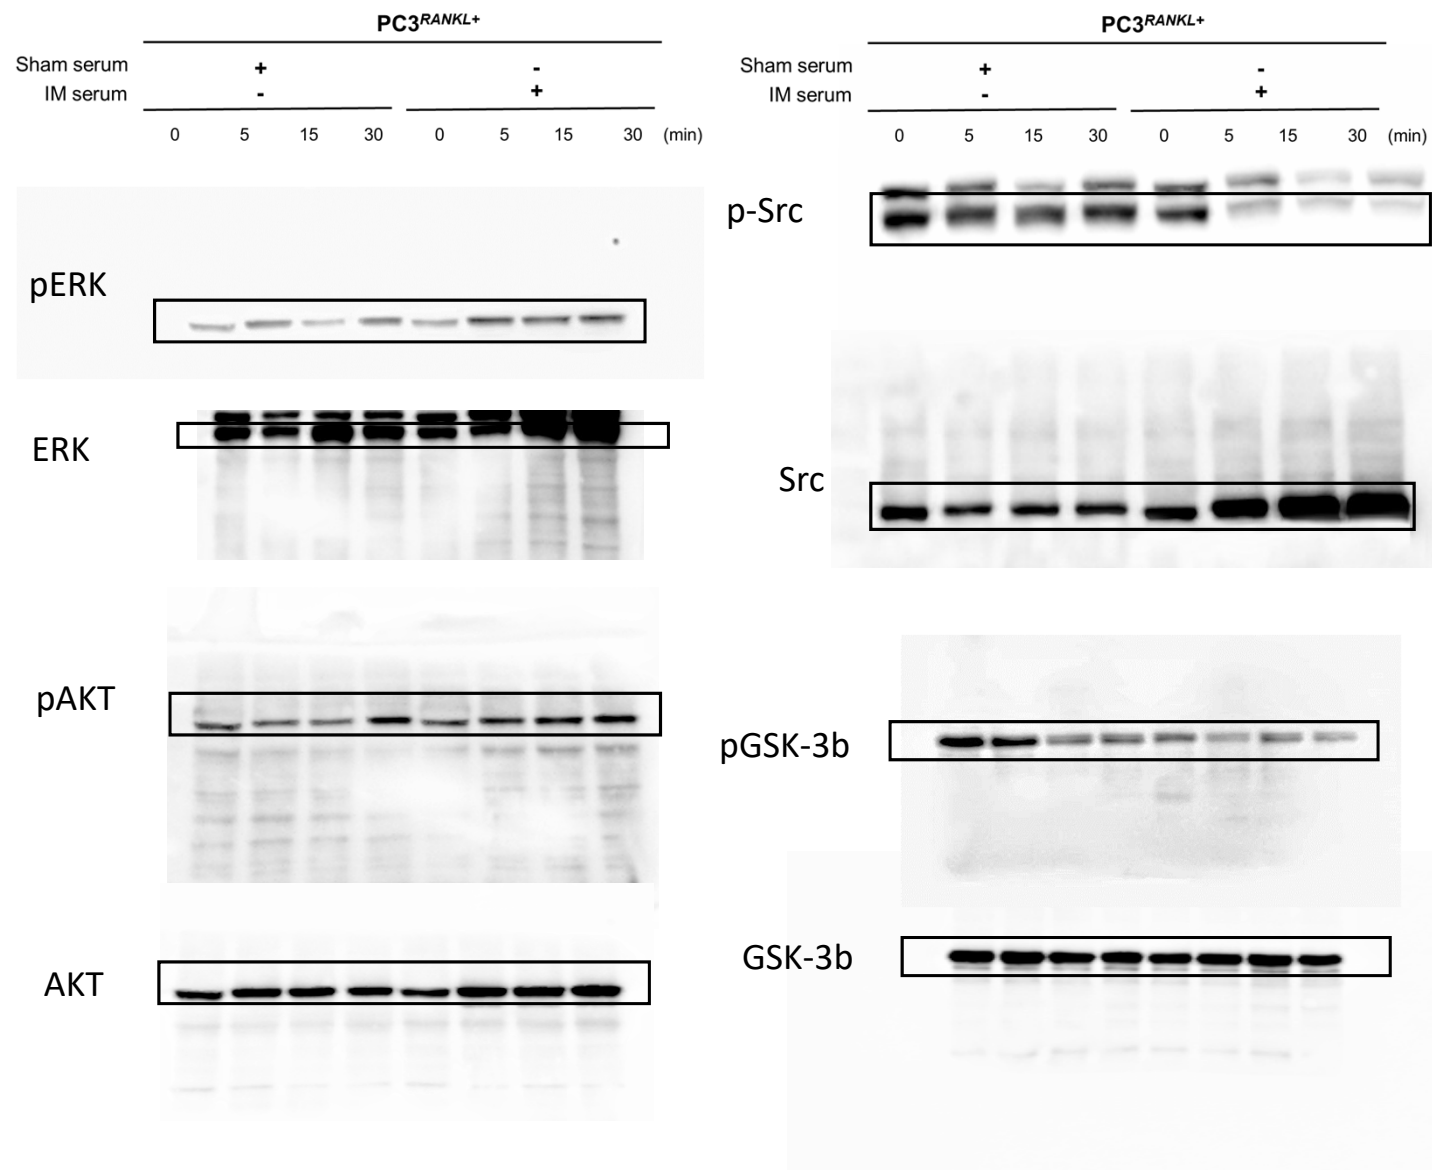

**Figure 5E Original**

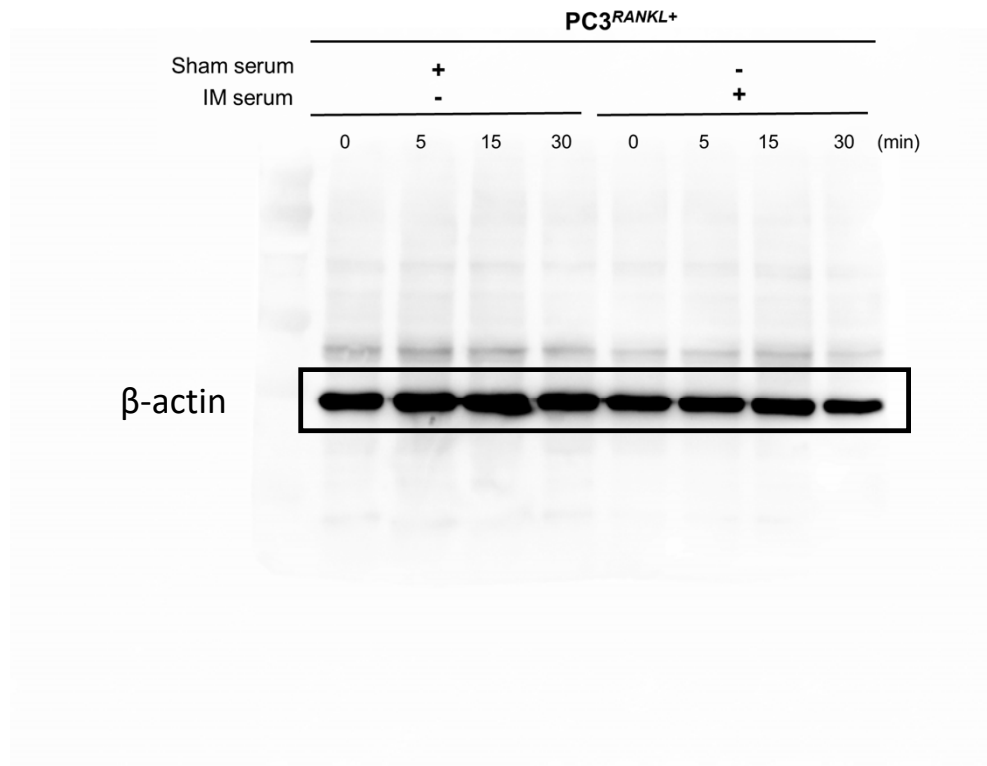

**Figure 5G Original**

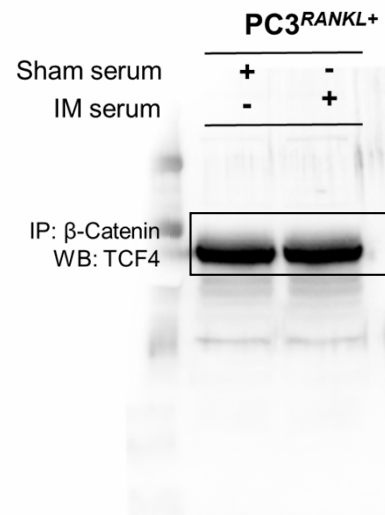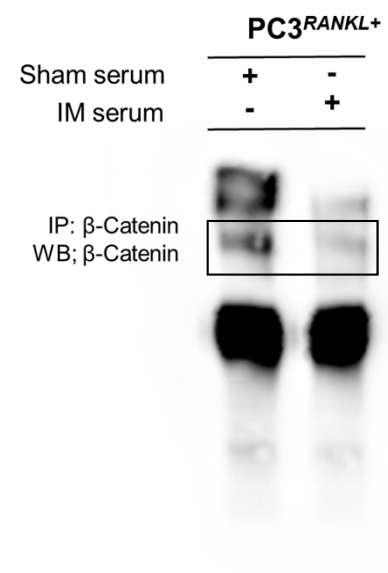

## Supple 2 Original

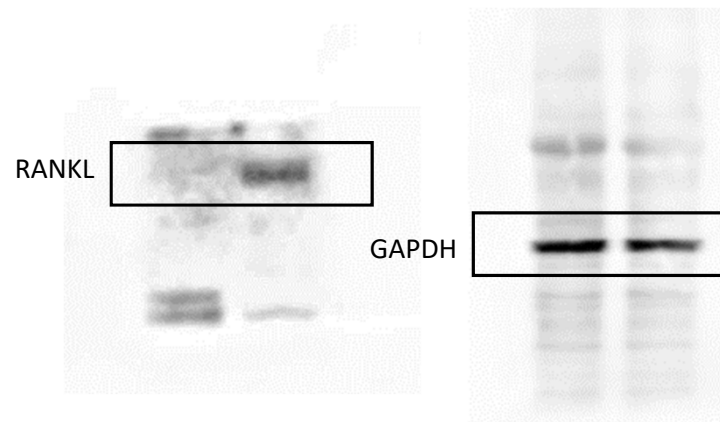

Supplement: 41598_2021_91721_MOESM1_ESM.pdf [file 41598_2021_91721_MOESM1_ESM.pdf]
